# Supplementary material
Source: Research Square preprint supplement (doi:10.21203/rs.3.rs-9108192/v1)
Supplement: Supplementary file 1 [file 4d69f55c57cf81ce4b381363.docx]

| **Supplementary Table S5** | | | | | | | | | |
| --- | --- | --- | --- | --- | --- | --- | --- | --- | --- |
| **Gene** | **g.DNA Nomenclature** | **c.DNA** | **Protein change** | **RefSeq transcript** | **Consequence** | **REF/ALT reads** | **VAF %** | **CADD** | **COSMIC ID** |
| ASXL1 | Chr20:g.32434600_32434622del | c.1888_1910del | p.(His630Thrfs*73) | NM_015338.6 | Frameshift | 378/34 | 11.6% | 34 |  |
| ASXL1 | Chr20:g.32433918GT>T | c.1719+1del | p.(?) | NM_015338.6 | Splice donor | 239/11 | 5.2% |  |  |
| CBL | Chr11:g.119278293G>C | c.1223G>C | p.(Trp408Ser) | NM_005188.4 | Missense | 211/4 | 3.5% | 34 | COSV50643606 |
| DNMT3A | Chr2:g.25246189del | c.1400del | p.(Val467*) | NM_022552.5 | Frameshift | 1069/47 | 4.6% | 35 |  |
| DNMT3A | Chr2:g.25246177_25246185del | c.1404_1412del | p.(Lys468_Ile471fs*) | NM_022552.5 | Frameshift | 1126/47 | 4.4% |  |  |
| DNMT3A | Chr2:g.25235708del | c.2596del | p.(Arg866*) | NM_022552.5 | Frameshift | 539/31 | 6.1% |  |  |
| DNMT3A | Chr2:g.25240305_25240306del | c.2318_2319del | p.(Leu773*) | NM_022552.5 | Frameshift | 452/21 | 4.5% |  |  |
| DNMT3A | Chr2:g.25244281_25244289del | c.1717_1725del | p.(Gln573_Ala575del) | NM_022552.5 | Inframe deletion | 354/24 | 6.4% |  |  |
| DNMT3A | Chr2:g.25234286C>T | c.2732G>A | p.(Cys911Tyr) | NM_022552.5 | Missense | 293/13 | 4.4% | 29.8 | COSV104585302 |
| DNMT3A | Chr2:g.25240431G>C | c.2193C>G | p.(Phe731Leu) | NM_022552.5 | Missense | 467/13 | 2.9% | 31 | COSV99066219 |
| DNMT3A | Chr2:g.25240699A>G | c.2114T>C | p.(Ile705Thr) | NM_022552.5 | Missense | 713/14 | 2.1% | 28.7 | COSV53042985 |
| DNMT3A | Chr2:g.25240688G>T | c.2125C>A | p.(Pro709Thr) | NM_022552.5 | Missense | 870/17 | 2.2% | 30 |  |
| DNMT3A | Chr2:g.25234374G>A | c.2644C>T | p.(Arg882Cys) | NM_022552.5 | Missense | 300/36 | 11.7% | 34 | COSV53036332 |
| DNMT3A | Chr2:g.25244321C>T | c.1685G>A | p.(Cys562Tyr) | NM_022552.5 | Missense | 337/17 | 5.4% | 31 | COSV53040963 |
| DNMT3A | Chr2:g.25243922A>G | c.1912T>C | p.(Ser638Pro) | NM_022552.5 | Missense | 484/20 | 4.3% | 32 | COSV106359911 |
| DNMT3A | Chr2:g.25247721A>T | c.884T>A | p.(Leu295Gln) | NM_022552.5 | Missense | 124/6 | 6.3% | 32 |  |
| DNMT3A | Chr2:g.25234300C>G | c.2718G>C | p.(Lys906Asn) | NM_022552.5 | Missense | 319/5 | 2.3% | 31 |  |
| DNMT3A | Chr2:g.25240360A>G | c.2264T>C | p.(Phe755Ser) | NM_022552.5 | Missense | 334/7 | 2.5% | 33 | COSV53051364 |
| DNMT3A | Chr2:g.25241664G>C | c.1980C>G | p.(Tyr660*) | NM_022552.5 | Stop gained | 454/8 | 2.6% | 42 |  |
| DNMT3A | Chr2:g.25247615C>T | c.990G>A | p.(Trp330*) | NM_022552.5 | Stop gained | 981/27 | 2.8% | 39 | COSV53037025 |
| DNMT3A | Chr2:g.25240313G>A | c.2311C>T | p.(Arg771*) | NM_022552.5 | Stop gained | 226/22 | 9.0% | 45 | COSV53041751 |
| JAK2 | Chr9:g.5066682G>A | c.1219G>A | p.(Asp407Asn) | NM_004972.4 | Missense | 118/91 | 43.7% | 28 |  |
| PPM1D | Chr17:g.60663242_60663243del | c.1508_1509del | p.(Ser503*) | NM_003620.4 | Frameshift | 106/2 | 2.9% |  |  |
| RUNX1 | Chr21:g.34834545G>A | c.670C>T | p.(Arg224Trp) | NM_001754.5 | Missense | 85/2 | 2.8% | 27.7 | COSV104611281 |
| RUNX1 | Chr21:g.34892925C>T | c.97G>A | p.(Asp33Asn) | NM_001754.5 | Missense | 72/22 | 23.1% | 24.4 |  |
| SF3B1 | Chr2:g.197421075_197421076delinsAC | c.253_254delinsGT | p.(His85Val) | NM_012433.4 | Missense | 137/125 | 47.7% |  |  |
| SF3B1 | Chr2:g.197402635C>A | c.1998G>T | p.(Lys666Asn) | NM_012433.4 | Missense | 257/11 | 4.4% | 25.7 | COSV59205799 |
| TET2 | Chr4:g.105275719ACCTC>A | c.5210_5213del | p.(Thr1737*) | NM_001127208.3 | Frameshift | 306/5 | 2.5% |  |  |
| TET2 | Chr4:g.105234159CGTGT>C | c.218_221del | p.(Arg73*) | NM_001127208.3 | Frameshift | 103/2 | 3.2% |  |  |
| TET2 | Chr4:g.105236615AC>A | c.2674del | p.(Gln892*) | NM_001127208.3 | Frameshift | 258/20 | 8.1% |  |  |
| TET2 | Chr4:g.105276128T>C | c.5618T>C | p.(Ile1873Thr) | NM_001127208.3 | Missense | 203/10 | 5.3% | 26.1 | COSV54396330 |
| TET2 | Chr4:g.105276221A>G | c.5711A>G | p.(His1904Arg) | NM_001127208.3 | Missense | 462/55 | 10.3% | 25.4 | COSV54397883 |
| TET2 | Chr4:g.105275457T>A | c.4947T>A | p.(Tyr1649*) | NM_001127208.3 | Stop gained | 230/25 | 10.2% | 33 |  |
| TET2 | Chr4:g.105236688C>T | c.2746C>T | p.(Gln916*) | NM_001127208.3 | Stop gained | 238/6 | 2.9% | 36 | COSV54396018 |

**Supplementary Table S5 – Somatic clonal haematopoiesis-associated variants within the at-risk cohort**. This table contains putative somatic variants identified within canonical genes associated with clonal haematopoiesis (CH). Genomic coordinates are reported relative to the human reference genome build GRCh38. Variant nomenclature follows HGVS guidelines, with coding DNA (c.DNA) and protein (p.) changes annotated according to the selected RefSeq transcript. For each variant, the number of reference (REF) and duplex-consensus alternate (ALT) reads is shown, along with the calculated variant allele fraction (VAF) in peripheral blood. Pathogenicity scores are reported using CADD (v1.7). COSMIC identifiers are provided where available.
