# Supplementary material
Source: Research Square preprint supplement (doi:10.21203/rs.3.rs-9108192/v1)
Supplement: Supplementary file 2 [file 652acb3cb75365761c958ce2.docx]

| **Gene** | **g.DNA Nomenclature** | **RefSeq transcript:c.DNA** | **Protein change** | **dbSNP** | **Consequence** | **Carriers** | **gnomADe AF** | **CADD** | **AlphaMissense** | **ClinVar** |
| --- | --- | --- | --- | --- | --- | --- | --- | --- | --- | --- |
| HEATR5A | Chr14:g.31305118C>T | NM_015473.4:c.5026G>A | p.(Gly1676Arg) | rs61754158 | Missense | 9 | 0.007108 | 28.8 | NA | Likely benign |
| COL4A3 | Chr2:g.227307878T>C | NM_000091.5:c.4421T>C | p.(Leu1474Pro) | rs200302125 | Missense | 9 | 0.0046 | 23.8 | Likely Pathogenic | Benign/Likely benign |
| DCDC2B | Chr1:g.32209326T>C | NM_001099434.2:c.233T>C | p.(Val78Ala) | rs144804850 | Missense | 9 | 0.007873 | 26.4 | Ambiguous | NA |
| SRRM2 | Chr16:g.2764949C>T | NM_016333.4:c.4421C>T | p.(Ser1474Phe) | rs140421601 | Missense | 9 | 0.00858 | 30 | Ambiguous | Likely benign |
| DNAH12 | Chr3:g.57386494C>T | NM_001366028.2:c.7549G>A | p.(Ala2517Thr) | rs1052712465 | Missense | 9 | 0 | 22.6 | NA | NA |
| HAVCR1 | Chr5:g.157055285C>G | NM_001173393.3:c.295G>C | p.(Asp99His) | rs56084311 | Missense | 9 | 0.009317 | 21.9 | Likely Pathogenic | Benign |
| COG1 | Chr17:g.73193127G>C | NM_018714.3:c.58G>C | p.(Ala20Pro) | rs142719529 | Missense | 8 | 0.004177 | 32 | Likely Pathogenic | Benign/Likely benign |

**Supplementary Table S4 - Rare, potentially pathogenic variants reoccurring within the at-risk cohort (Exome-wide)**. This table contains 7, rare (<1% population frequency), potentially pathogenic variants identified in exome-wide analysis. Only variants identified in eight or more individuals within the at-risk cohort were included. Genomic coordinates are reported relative to the human reference genome build GRCh38. Variant nomenclature follows HGVS guidelines, with coding DNA (c.DNA) and protein (p.) changes annotated according to the selected RefSeq transcript. Pathogenicity scores are reported using CADD (v1.7) and pathogenicity classification from AlphaMissense and ClinVar are displayed for each variant to aid interpretation.
