# Supplementary material
Source: Research Square preprint supplement (doi:10.21203/rs.3.rs-9108192/v1)
Supplement: Supplementary file 3 [file 680591d4c3ef4f4c42720647.docx]

| **Supplementary Table S2** |  |  |
| --- | --- | --- |
| **RA panel (68 genes)** | **Discovery panel (76 genes)** | **CH panel (12 genes)** |
| ARAP1 | ACP5 | ASXL1 |
| ATF6B | ADA2 | CBL |
| BACH2 | ADAM17 | DNMT3A |
| BLK | ADAR | IDH1 |
| C5orf30 | ALPI | IDH2 |
| C6orf10 | ALPK1 | JAK2 |
| CCL21 | AP1S3 | PPM1D |
| CCR5 | ATAD3A | RUNX1 |
| CCR6 | C2orf69 | SF3B1 |
| CD40 | CARD14 | SRSF2 |
| CDK4RAP2 | CDC42 | TET2 |
| CPD | CEBPE | TP53 |
| CRP | COPA |  |
| CTLA4 | DNASE1L3 |  |
| CUTA | DNASE2 |  |
| DKK1 | ELF4 |  |
| DNASE1L3 | F12 |  |
| DPP4 | HAVCR2 |  |
| EHMT2 | HCK |  |
| FCRL3 | IFIH1 |  |
| FLT3 | IL1R1 |  |
| FOXO3 | IL1RN |  |
| GATA3 | IL36RN |  |
| GZMB | ISG15 |  |
| IL15 | LACC1 |  |
| IL23R | LPIN2 |  |
| IL2RA | LYN |  |
| IL2RB | MEFV |  |
| IL4 | MVK |  |
| IL4R | NCSTN |  |
| IL6ST | NLRC4 |  |
| IRF4 | NLRP1 |  |
| IRF5 | NLRP12 |  |
| KLF2 | NLRP3 |  |
| LBH | NLRP7 |  |
| LEF1 | NOD2 |  |
| LILRA3 | OAS1 |  |
| LY6G5C | OTULIN |  |
| MICA | PLCG1 |  |
| MMP9 | PLCG2 |  |
| NOTCH4 | POLA1 |  |
| PADI2 | POMP |  |
| PADI4 | PSMA3 |  |
| PLB1 | PSMB10 |  |
| PLEKHM1 | PSMB4 |  |
| PRKCH | PSMB8 |  |
| PSMB9 | PSMB9 |  |
| PTGER4 | PSMG2 |  |
| PTPN22 | PSTPIP1 |  |
| RAD51B | RBCK1 |  |
| RBFOX1 | RELA |  |
| SCAF4 | RIGI |  |
| SKIC2 | RIPK1 |  |
| SPAG16 | RNASEH2A |  |
| SPP1 | RNASEH2B |  |
| STAG1 | RNASEH2C |  |
| STAT4 | SAMD9L |  |
| SUPT20H | SAMHD1 |  |
| TAP2 | SH3BP2 |  |
| TNF | SKIC2 |  |
| TNFAIP3 | SLC29A3 |  |
| TNFRSF11B | STAT2 |  |
| TNFSF13B | STAT4 |  |
| TNKS2 | STING1 |  |
| TRAF1 | SYK |  |
| TYK2 | TBK1 |  |
| VWA7 | TNFAIP3 |  |
| ZFP36L1 | TNFRSF11A |  |
|  | TNFRSF1A |  |
|  | TRAP1 |  |
|  | TREX1 |  |
|  | TRIM22 |  |
|  | TRNT1 |  |
|  | UBA1 |  |
|  | USP18 |  |
|  | WDR1 |  |

**Supplementary Table S2 – Virtual gene panels used in gene-targeted variant identification.** Virtual gene panels associated with rheumatoid arthritis (RA panel), inflammation and interferonopathy (Discovery panel) were used to filter biological relevant germline variants identified within the at-risk cohorts. Canonical genes associated with clonal haematopoiesis (CH panel) were used in the somatic variant calling pipeline to define somatic CH prevalence within the cohort. The Discovery gene panel was also used to screen for somatic variants in genes previously associated with autoinflammatory conditions.
