# Supplementary material
Source: Research Square preprint supplement (doi:10.21203/rs.3.rs-9108192/v1)
Supplement: Supplementary file 4 [file d02f396ccfd272642e72a797.docx]

| **Gene** | **g.DNA Nomenclature** | **c.DNA** | **Protein change** | **dbSNP** | **Consequence** | **Carriers** | **gnomAD AF** | **CADD** | **AlphaMissense** | **ClinVar** |
| --- | --- | --- | --- | --- | --- | --- | --- | --- | --- | --- |
| ADAM17 | Chr2:g.9492963C>T | NM_003183.6:c.2017G>A | p.(Val673Ile) | rs61754177 | Missense | 4 | 0.007545 | 28.1 | Ambiguous | Benign/Likely benign |
| ALPK1 | Chr4:g.112382476A>G | NM_025144.4:c.200A>G | p.(Gln67Arg) | rs33943680 | Missense | 4 | 0.008106 | 24.8 | Likely Pathogenic | Benign/Likely benign |
| AP1S3 | Chr2:g.223777776G>A | NM_001039569.2:c.97C>T | p.(Arg33Trp) | rs138292988 | Missense | 2 | 0.009863 | 24.8 | Likely Pathogenic | Benign/Likely benign |
| ACP5 | Chr19:g.11576789C>T | NM_001611.5:c.316G>A | p.(Val106Met) | rs148219285 | Missense | 1 | 0.0003714 | 25.8 | Ambiguous | Uncertain significance |
| ADA2 | Chr22:g.17209400A>G | NM_001282225.2:c.278T>C | p.(Ile93Thr) | rs767399919 | Missense | 1 | 0.000026 | 23.0 | Ambiguous | Uncertain significance |
| CEBPE | Chr14:g.23119073A>G | NM_001805.4:c.19T>C | p.(Tyr7His) | rs768805943 | Missense | 1 | 0.00000275 | 24.4 | Likely Pathogenic | NA |
| COPA | Chr1:g.160311877T>A | NM_004371.4:c.1067A>T | p.(Gln356Leu) | rs1445372702 | Missense | 1 | 0.00000205 | 24.4 | Ambiguous | NA |
| HAVCR2 | Chr5:g.157106719G>A | NM_032782.5:c.302C>T | p.(Thr101Ile) | rs147827860 | Missense | 1 | 0.004398 | 21.7 | Ambiguous | Benign |
| IFIH1 | Chr2:g.162276724C>T | NM_022168.4:c.2267G>A | p.(Gly756Glu) |  | Missense | 1 | 0 | 26.8 | Likely Pathogenic | NA |
| IL36RN | Chr2:g.113062547C>T | NM_012275.3:c.338C>T | p.(Ser113Leu) | rs144478519 | Missense | 1 | 0.003444 | 22.3 | Ambiguous | Conflicting classifications of pathogenicity |
| NLRP12 | Chr19:g.53823969G>A | NM_144687.4:c.206C>T | p.(Ala69Val) | rs372898890 | Missense | 1 | 0.000013 | 24.0 | Ambiguous | Uncertain significance |
| NOD2 | Chr16:g.50707880C>T | NM_001370466.1:c.485C>T | p.(Thr162Met) | rs61755182 | Missense | 1 | 0.003044 | 24.2 | NA | Conflicting classifications of pathogenicity |
| NOD2 | Chr16:g.50712018C>T | NM_001370466.1:c.2026C>T | p.(Arg676Cys) | rs5743277 | Missense | 1 | 0.004016 | 23.9 | NA | Conflicting classifications of pathogenicity |
| NOD2 | Chr16:g.50716899A>G | NM_001370466.1:c.2474A>G | p.(Asn825Ser) | rs104895467 | Missense | 1 | 0.0007047 | 24.6 | NA | Conflicting classifications of pathogenicity |
| POLA1 | ChrX:g.24826487G>C | NM_001330360.2:c.3622G>C | p.(Asp1208His) | rs41548013 | Missense | 1 | 0.00736 | 22.7 | NA | Conflicting classifications of pathogenicity |
| PSTPIP1 | Chr15:g.77018500G>A | NM_003978.5:c.181G>A | p.(Ala61Thr) | rs568503340 | Missense | 1 | 0.0000175 | 33.0 | Ambiguous | Uncertain significance |
| RNASEH2A | Chr19:g.12807469T>C | NM_006397.3:c.374T>C | p.(Ile125Thr) | rs150008398 | Missense | 1 | 0.0000534 | 27.0 | Likely Pathogenic | Uncertain significance |
| SKIC2 | Chr6:g.31968937G>C | NM_006929.5:c.3247G>C | p.(Ala1083Pro) | rs761181075 | Missense | 1 | 0.0000267 | 26.0 | Likely Pathogenic | NA |
| TRAP1 | Chr16:g.3662015G>T | NM_016292.3:c.1912C>A | p.(Leu638Met) | rs147600197 | Missense | 1 | 0.0002262 | 22.9 | Ambiguous | Uncertain significance |
| TRAP1 | Chr16:g.3664432C>T | NM_016292.3:c.1411G>A | p.(Glu471Lys) | rs775141873 | Missense | 1 | 0.0001219 | 32.0 | Likely Pathogenic | Uncertain significance |

**Supplementary Table S3 - Rare, potentially pathogenic germline variants identified within the ACPA+ progressors with arthralgia (Discovery panel)**. This table contains 20, rare (<1% population frequency), potentially pathogenic variants identified in the discovery gene panel containing genes associated with inflammation and interferonopathies. Genomic coordinates are reported relative to the human reference genome build GRCh38. Variant nomenclature follows HGVS guidelines, with coding DNA (c.DNA) and protein (p.) changes annotated according to the selected RefSeq transcript. Pathogenicity scores are reported using CADD (v1.7) and pathogenicity classification from AlphaMissense and ClinVar is displayed for each variant to aid interpretation.
