# Supplementary material
Source: Research Square preprint supplement (doi:10.21203/rs.3.rs-9108192/v1)
Supplement: Supplementary file 5 [file d1cce92c08c4ee2a214392a3.docx]

# ACPA+ at-risk cohort baseline characteristic summary

| **Characteristic** | **Arthralgia**  **Non-progressors** | **Arthralgia**  **Progressors** | **Palindromic Rheumatism**  **Non-progressors** | **Palindromic Rheumatism**  **Progressors** |
| --- | --- | --- | --- | --- |
| **N** | 46 | 48 | 50 | 48 |
| **Age** | 49.9 ± 15.9 | 56.0 ± 16.2 | 43.1 ± 16.1 | 51.8 ± 13.0 |
| **Female (%)** | 65.2 | 60.4 | 64.0 | 75.0 |
| **Male (%)** | 34.8 | 39.6 | 36.0 | 25.0 |
| **Never smoked (%)** | 47.8 | 31.2 | 60.0 | 29.2 |
| **Previous smoker (%)** | 23.9 | 37.5 | 22.0 | 41.7 |
| **Current smoker (%)** | 28.3 | 31.2 | 18.0 | 29.2 |
| **Rheumatoid Factor+ (%)** | 26.1 | 66.7 | 18.0 | 50.0 |
| **Family History of Rheumatoid Arthritis + (%)** | 28.3 | 27.1 | 34.0 | 39.6 |

**Supplementary Table S1.** Baseline characteristics of four predefined ACPA+ clinical subgroups: *Arthralgia non-progressors*, *Arthralgia progressors*, *palindromic rheumatism (PR) non-progressors*, and *PR progressors*. Variables shown include age (mean ± s.d.), sex distribution, smoking history, rheumatoid factor (RF) positivity, and family history of rheumatoid arthritis. Data are derived directly from the baseline demographic dataset.
